# Supplementary material for: Prediction of Massive Transfusion in Trauma Patients with Shock Index, Modified Shock Index, and Age Shock Index
Source: MDPI journal article supplement (doi:10.3390/ijerph13070683), 2016-07-05

# Supplementary Materials: Prediction of Massive Transfusion in Trauma Patients with Shock Index, Modified Shock Index, and Age Shock Index

Cheng-Shyuan Rau, Shao-Chun Wu, Spencer C.H. Kuo, Pao-Jen Kuo, Shiun-Yuan Hsu, Yi-Chun Chen, Hsiao-Yun Hsieh, Ching-Hua Hsieh and Hang-Tsung Liu

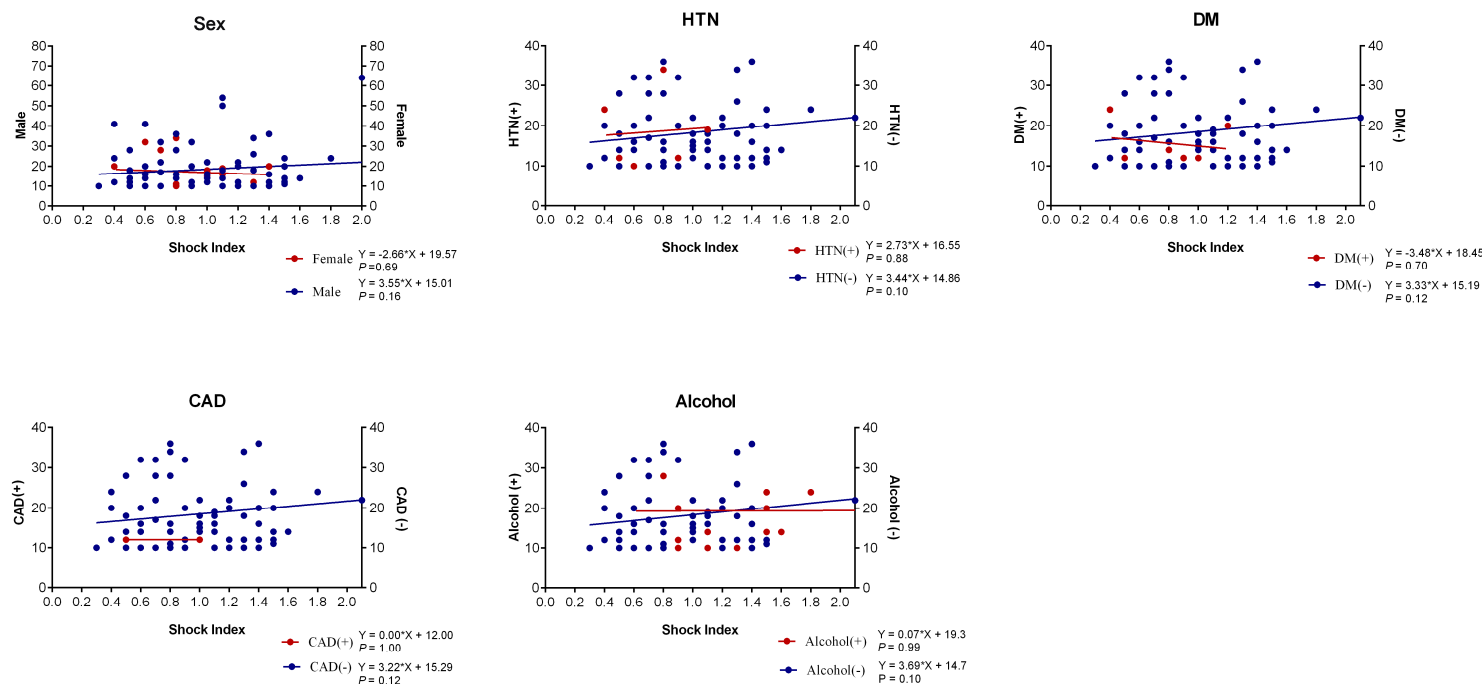

**Figure S1.** Correlation of the amount of transfused blood to SI in the patients stratified according to sex, HTN, DM, CAD, or alcohol intoxication.

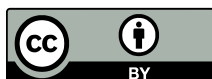

Supplement: s1 [file s1]
